# Supplementary material for: The experiences of receiving a diagnosis of attention deficit hyperactivity disorder during adulthood in Japan: a qualitative study
Source: PubMed Central journal article supplement (PMC7366299; doi:10.1186/s12888-020-02774-y), 2020-07-16
Supplement: 12888_2020_2774_MOESM1_ESM.pdf [file 12888_2020_2774_MOESM1_ESM.pdf]

## Interview Guide

### 1) Before diagnosis

- How did you spend your life before you were diagnosed with ADHD?
- What made you come to see a doctor? (situation, triggers, troubles in daily life)
- How did you feel about your condition before coming?
- Did you have any advice from your family or people around you at work (school) before coming?

### 2) When you were diagnosed with ADHD

- What were your initial thoughts? (good things and bad things)
- What kind of explanation did you receive from your doctor?
- How did you feel when you heard the explanation from your doctor?
- How did you feel about your symptoms?
- Are there any explanations other than from your doctor; if so, how were they and how did you feel when you heard about them?

### 3) After ADHD diagnosis

- What did you do after your diagnosis?
- Did your feelings about the diagnosis change with time; if so, in what way?
- Since your ADHD diagnosis, are there any changes at work/school?
- Since your ADHD diagnosis, are there any changes in your life at home?
- What do you think will your life be in the future?
